# Supplementary material for: Cytokinin Modulates Responses to Phytomelatonin in Arabidopsis thaliana under High Light Stress
Source: MDPI journal article supplement (doi:10.3390/ijms24010738), 2023-01-01
Supplement: s1 [file s1]

Table S1. Effect of HL stress and melatonin on the expression of cytokinin synthesis and signaling genes metabolism, reception and signaling genes. The data presented in the table are the mean values ( $n \geq 3$ ). Error bars represent SEs. Different letters denote statistically significant differences between variants within the same genotype at  $p < 0.05$  (ANOVA with post hoc Tukey's multiple-comparison test), asterisks indicate statistically significant differences between the mutants and the wild type under corresponding type of treatment at  $p < 0.05$  (t-test).

| Gene        | Genotype          | Experimental conditions          |                                  |                                  |                                  |
|-------------|-------------------|----------------------------------|----------------------------------|----------------------------------|----------------------------------|
|             |                   | Control                          | Stress                           | Control + 50 $\mu$ M melatonin   | Stress + 50 $\mu$ M melatonin    |
| <i>IPT3</i> | WT                | 1.000 $\pm$ 0.098 <sup>b</sup>   | 0.408 $\pm$ 0.053 <sup>a</sup>   | 0.990 $\pm$ 0.101 <sup>b</sup>   | 0.795 $\pm$ 0.084 <sup>b</sup>   |
|             | <i>ahk2,3</i>     | 6.787 $\pm$ 0.707 <sup>b*</sup>  | 5.239 $\pm$ 0.564 <sup>a*</sup>  | 7.229 $\pm$ 0.809 <sup>b*</sup>  | 3.427 $\pm$ 0.311 <sup>a*</sup>  |
|             | <i>arr1,10,12</i> | 4.378 $\pm$ 0.511 <sup>b*</sup>  | 2.907 $\pm$ 0.271 <sup>a*</sup>  | 3.638 $\pm$ 0.425 <sup>ab*</sup> | 2.360 $\pm$ 0.267 <sup>a*</sup>  |
|             | <i>ipt3,5,7</i>   | -                                | -                                | -                                | -                                |
| <i>IPT5</i> | WT                | 1.000 $\pm$ 0.086 <sup>b</sup>   | 0.718 $\pm$ 0.084 <sup>a</sup>   | 1.035 $\pm$ 0.119 <sup>b</sup>   | 0.971 $\pm$ 0.096 <sup>b</sup>   |
|             | <i>ahk2,3</i>     | 2.278 $\pm$ 0.321 <sup>b*</sup>  | 1.273 $\pm$ 0.139 <sup>a*</sup>  | 2.046 $\pm$ 0.255 <sup>b*</sup>  | 1.358 $\pm$ 0.144 <sup>a</sup>   |
|             | <i>arr1,10,12</i> | 1.221 $\pm$ 0.111 <sup>a</sup>   | 0.789 $\pm$ 0.088 <sup>b</sup>   | 1.096 $\pm$ 0.131 <sup>a</sup>   | 0.725 $\pm$ 0.074 <sup>b</sup>   |
|             | <i>ipt3,5,7</i>   | -                                | -                                | -                                | -                                |
| <i>LOG7</i> | WT                | 1.000 $\pm$ 0.126 <sup>c</sup>   | 0.220 $\pm$ 0.030 <sup>b</sup>   | 0.872 $\pm$ 0.091 <sup>c</sup>   | 0.104 $\pm$ 0.013 <sup>a</sup>   |
|             | <i>ahk2,3</i>     | 0.245 $\pm$ 0.019 <sup>b*</sup>  | 0.102 $\pm$ 0.011 <sup>a*</sup>  | 0.222 $\pm$ 0.027 <sup>b*</sup>  | 0.115 $\pm$ 0.014 <sup>a</sup>   |
|             | <i>arr1,10,12</i> | 0.184 $\pm$ 0.021 <sup>ab*</sup> | 0.240 $\pm$ 0.23 <sup>b</sup>    | 0.228 $\pm$ 0.025 <sup>b*</sup>  | 0.129 $\pm$ 0.008 <sup>a</sup>   |
|             | <i>ipt3,5,7</i>   | 0.215 $\pm$ 0.023 <sup>c*</sup>  | 0.089 $\pm$ 0.07 <sup>b*</sup>   | 0.190 $\pm$ 0.020 <sup>c*</sup>  | 0.058 $\pm$ 0.006 <sup>a*</sup>  |
| <i>CKX3</i> | WT                | 1.000 $\pm$ 0.098 <sup>b</sup>   | 0.791 $\pm$ 0.086 <sup>b</sup>   | 1.123 $\pm$ 0.135 <sup>b</sup>   | 0.354 $\pm$ 0.047 <sup>a</sup>   |
|             | <i>ahk2,3</i>     | 0.052 $\pm$ 0.006 <sup>b*</sup>  | 0.018 $\pm$ 0.002 <sup>a*</sup>  | 0.047 $\pm$ 0.06 <sup>b*</sup>   | 0.021 $\pm$ 0.003 <sup>a*</sup>  |
|             | <i>arr1,10,12</i> | 0.142 $\pm$ 0.019 <sup>b*</sup>  | 0.058 $\pm$ 0.017 <sup>a*</sup>  | 0.052 $\pm$ 0.006 <sup>a*</sup>  | 0.050 $\pm$ 0.006 <sup>a*</sup>  |
|             | <i>ipt3,5,7</i>   | 1.711 $\pm$ 0.166 <sup>c*</sup>  | 0.269 $\pm$ 0.021 <sup>b*</sup>  | 0.195 $\pm$ 0.033 <sup>b*</sup>  | 0.116 $\pm$ 0.012 <sup>a*</sup>  |
| <i>CKX5</i> | WT                | 1.000 $\pm$ 0.102 <sup>a</sup>   | 1.019 $\pm$ 0.084 <sup>a</sup>   | 0.826 $\pm$ 0.084 <sup>a</sup>   | 0.928 $\pm$ 0.093 <sup>a</sup>   |
|             | <i>ahk2,3</i>     | 0.442 $\pm$ 0.051 <sup>b*</sup>  | 0.239 $\pm$ 0.025 <sup>a*</sup>  | 0.394 $\pm$ 0.038 <sup>b*</sup>  | 0.336 $\pm$ 0.037 <sup>ab*</sup> |
|             | <i>arr1,10,12</i> | 0.263 $\pm$ 0.027 <sup>a*</sup>  | 0.616 $\pm$ 0.063 <sup>b*</sup>  | 0.252 $\pm$ 0.025 <sup>a*</sup>  | 0.247 $\pm$ 0.022 <sup>a*</sup>  |
|             | <i>ipt3,5,7</i>   | 1.401 $\pm$ 0.137 <sup>ab</sup>  | 1.470 $\pm$ 0.161 <sup>ab*</sup> | 1.886 $\pm$ 0.235 <sup>b*</sup>  | 1.237 $\pm$ 0.136 <sup>a</sup>   |
| <i>AHK2</i> | WT                | 1.000 $\pm$ 0.098 <sup>c</sup>   | 0.277 $\pm$ 0.033 <sup>a</sup>   | 1.108 $\pm$ 0.124 <sup>c</sup>   | 0.565 $\pm$ 0.066 <sup>b</sup>   |
|             | <i>ahk2,3</i>     | -                                | -                                | -                                | -                                |
|             | <i>arr1,10,12</i> | 0.501 $\pm$ 0.062 <sup>b*</sup>  | 0.382 $\pm$ 0.042 <sup>a</sup>   | 0.441 $\pm$ 0.042 <sup>ab*</sup> | 0.391 $\pm$ 0.046 <sup>ab*</sup> |
|             | <i>ipt3,5,7</i>   | 1.316 $\pm$ 0.147 <sup>c</sup>   | 0.236 $\pm$ 0.026 <sup>a</sup>   | 0.582 $\pm$ 0.067 <sup>b*</sup>  | 0.222 $\pm$ 0.028 <sup>a*</sup>  |
| <i>AHK3</i> | WT                | 1.000 $\pm$ 0.076 <sup>b</sup>   | 0.709 $\pm$ 0.064 <sup>a*</sup>  | 1.001 $\pm$ 0.085 <sup>b</sup>   | 0.640 $\pm$ 0.052 <sup>a</sup>   |
|             | <i>ahk2,3</i>     | -                                | -                                | -                                | -                                |
|             | <i>arr1,10,12</i> | 0.514 $\pm$ 0.055 <sup>a*</sup>  | 0.462 $\pm$ 0.050 <sup>a*</sup>  | 0.400 $\pm$ 0.048 <sup>a*</sup>  | 0.459 $\pm$ 0.045 <sup>a</sup>   |
|             | <i>ipt3,5,7</i>   | 0.885 $\pm$ 0.093 <sup>b</sup>   | 0.561 $\pm$ 0.050 <sup>a</sup>   | 0.586 $\pm$ 0.063 <sup>a*</sup>  | 0.529 $\pm$ 0.054 <sup>a</sup>   |
| <i>AHK4</i> | WT                | 1.000 $\pm$ 0.091 <sup>a</sup>   | 4.408 $\pm$ 0.459 <sup>c</sup>   | 1.125 $\pm$ 0.098 <sup>a</sup>   | 2.401 $\pm$ 0.261 <sup>b</sup>   |
|             | <i>ahk2,3</i>     | 1.409 $\pm$ 0.124 <sup>a</sup>   | 1.654 $\pm$ 0.171 <sup>a*</sup>  | 1.248 $\pm$ 0.102 <sup>a</sup>   | 1.352 $\pm$ 0.099 <sup>a*</sup>  |
|             | <i>arr1,10,12</i> | 0.919 $\pm$ 0.085 <sup>a</sup>   | 1.003 $\pm$ 0.103 <sup>a*</sup>  | 0.726 $\pm$ 0.080 <sup>a</sup>   | 0.753 $\pm$ 0.078 <sup>a*</sup>  |
|             | <i>ipt3,5,7</i>   | 0.191 $\pm$ 0.016 <sup>a*</sup>  | 0.877 $\pm$ 0.061 <sup>c*</sup>  | 0.398 $\pm$ 0.041 <sup>b*</sup>  | 0.895 $\pm$ 0.092 <sup>c*</sup>  |

|              |                   |                           |                           |                           |                           |
|--------------|-------------------|---------------------------|---------------------------|---------------------------|---------------------------|
| <i>ARR1</i>  | WT                | 1.000±0.079 <sup>c</sup>  | 0.368±0.042 <sup>a</sup>  | 0.916±0.078 <sup>c</sup>  | 0.629±0.072 <sup>b</sup>  |
|              | <i>ahk2,3</i>     | 0.905±0.097 <sup>b</sup>  | 0.390±0.047 <sup>a</sup>  | 0.986±0.091 <sup>b</sup>  | 0.405±0.047 <sup>a</sup>  |
|              | <i>arr1,10,12</i> | -                         | -                         | -                         | -                         |
|              | <i>ipt3,5,7</i>   | 0.345±0.040 <sup>a*</sup> | 0.300±0.032 <sup>a</sup>  | 0.691±0.081 <sup>b</sup>  | 0.275±0.030 <sup>a*</sup> |
| <i>ARR4</i>  | WT                | 1.000±0.088 <sup>c</sup>  | 0.160±0.019 <sup>a</sup>  | 0.850±0.059 <sup>c</sup>  | 0.448±0.021 <sup>b</sup>  |
|              | <i>ahk2,3</i>     | 0.449±0.051 <sup>a*</sup> | 0.503±0.062 <sup>a*</sup> | 0.491±0.053 <sup>a*</sup> | 0.391±0.044 <sup>a</sup>  |
|              | <i>arr1,10,12</i> | 0.411±0.045 <sup>b*</sup> | 0.125±0.011 <sup>a*</sup> | 0.327±0.036 <sup>b*</sup> | 0.093±0.012 <sup>a*</sup> |
|              | <i>ipt3,5,7</i>   | 0.106±0.018 <sup>a*</sup> | 0.113±0.009 <sup>a*</sup> | 0.138±0.013 <sup>a*</sup> | 0.130±0.015 <sup>a*</sup> |
| <i>ARR5</i>  | WT                | 1.000±0.077 <sup>c</sup>  | 0.186±0.024 <sup>a</sup>  | 0.703±0.050 <sup>b</sup>  | 0.581±0.044 <sup>b</sup>  |
|              | <i>ahk2,3</i>     | 0.921±0.091 <sup>a</sup>  | 0.850±0.091 <sup>a*</sup> | 0.807±0.081 <sup>a</sup>  | 0.730±0.084 <sup>a</sup>  |
|              | <i>arr1,10,12</i> | 0.371±0.040 <sup>b*</sup> | 0.075±0.007 <sup>a*</sup> | 0.316±0.038 <sup>b*</sup> | 0.080±0.012 <sup>a*</sup> |
|              | <i>ipt3,5,7</i>   | 0.447±0.046 <sup>c*</sup> | 0.080±0.009 <sup>a*</sup> | 0.136±0.015 <sup>b*</sup> | 0.148±0.017 <sup>b*</sup> |
| <i>ARR12</i> | WT                | 1.000±0.093 <sup>c</sup>  | 0.305±0.041 <sup>a</sup>  | 0.999±0.114 <sup>c</sup>  | 0.568±0.061 <sup>b</sup>  |
|              | <i>ahk2,3</i>     | 0.912±0.090 <sup>b</sup>  | 0.409±0.048 <sup>a</sup>  | 0.969±0.090 <sup>b</sup>  | 0.445±0.043 <sup>a</sup>  |
|              | <i>arr1,10,12</i> | -                         | -                         | -                         | -                         |
|              | <i>ipt3,5,7</i>   | 0.232±0.019 <sup>b*</sup> | 0.280±0.032 <sup>a</sup>  | 0.429±0.046 <sup>b*</sup> | 0.228±0.024 <sup>b*</sup> |
| <i>CRF6</i>  | WT                | 1.000±0.114 <sup>a</sup>  | 2.214±0.246 <sup>b</sup>  | 0.982±0.086 <sup>a</sup>  | 1.070±0.098 <sup>a</sup>  |
|              | <i>ahk2,3</i>     | 1.401±0.165 <sup>a</sup>  | 3.123±0.325 <sup>b</sup>  | 1.352±0.147 <sup>a</sup>  | 3.574±0.277 <sup>b*</sup> |
|              | <i>arr1,10,12</i> | 0.842±0.094 <sup>a</sup>  | 3.368±0.434 <sup>b</sup>  | 1.124±0.134 <sup>a</sup>  | 4.175±0.422 <sup>b*</sup> |
|              | <i>ipt3,5,7</i>   | 0.228±0.031 <sup>a*</sup> | 2.721±0.223 <sup>c</sup>  | 0.811±0.099 <sup>b</sup>  | 4.595±0.547 <sup>d*</sup> |
