# Supplementary material for: Cytokinin Modulates Responses to Phytomelatonin in Arabidopsis thaliana under High Light Stress
Source: MDPI journal article supplement (doi:10.3390/ijms24010738), 2023-01-01
Supplement: s1 [file s1]

**Table S2.** List of primers used for RT-qPCR.

| <b>Gene name</b> | <b>Locus</b> | <b>Forward primer (5'-3')</b>         | <b>Reverse primer (5'-3')</b>        |
|------------------|--------------|---------------------------------------|--------------------------------------|
| <i>SNAT1</i>     | AT1G32070    | TAC GCA ACT TGT GGA<br>ACC ACC T      | ATC ATA AAC ATC<br>AAT CTC ACC ACC A |
| <i>ASMT</i>      | AT4G35160    | GCAAAGAAGCGGTCCC<br>TCCAA             | GTCCGTTCTTTGCCT<br>GTGCTTGT          |
| <i>COMT</i>      | AT5G54160    | GGA GTG ACG AAC ATT<br>GCG T          | TCT CGG TTC GTT<br>CTT TGC CT        |
| <i>CAND2</i>     | AT3G05010    | ATG CGA GTG CTC AGC<br>GAG AT         | TTA TTC CCA ATC<br>AGC GTC GAA GAA T |
| <i>GPA1</i>      | AT2G26300    | CGT TTG CGA GTG GTT<br>CAG AGA T      | CCA AAG CCG TCG<br>TCC TGT AGA T     |
| <i>ELIP2</i>     | AT4G14690    | ACG GGA GAC TAG CAA<br>TGG TT         | CCT AGA AAC CAC<br>CCG ACA CC        |
| <i>psbD</i>      | AtCg00270    | GGA TGA CTG GTT ACG<br>GAG GG         | GGT TGT ACC TGT<br>GAA CCA ACC       |
| <i>rbcL</i>      | AtCg00490    | CGG GTA CAT GCG AAG<br>AAA TGA        | TCT CGG TCA AAG<br>CAG GCA TA        |
| <i>IPT3</i>      | AT3G63110    | AGT GGA ATG GTT GAG<br>GGA GTC        | CAA GAA CTGCTC<br>GTT CCT GA         |
| <i>IPT5</i>      | AT5G19040    | AGT TAC AGC GAT GAC<br>CAC CA         | GGC AGA GAT CTC<br>CGG TAG G         |
| <i>LOG7</i>      | AT5G06300    | CGC TGT TAA CGT TTA<br>TTG ATA AGG C  | TTA TCT CAT CAA<br>ACT CCG GTT CA    |
| <i>CKX3</i>      | AT5G56970    | TCT CAA TAC ACA GTC<br>AAC GAG GA     | TCG TAC ATA AAC<br>CCT CTT ACA TGG   |
| <i>CKX5</i>      | AT1G75450    | CCA TGG TCC TCA AAT<br>TAG TAA CG     | TCT GAG CAT CTC<br>ATC ACC TCT C     |
| <i>AHK2</i>      | AT5G35750    | GTC TAT AAC TTG TGA<br>GCT CTT GAA TC | GCT CGT GTC ATA<br>GAC AGC AAA GGT C |
| <i>AHK3</i>      | AT1G27320    | GCA TCG GAG CTT TGA<br>ACC AT         | GGA TAT GGA TGG<br>TCC GAC TTG       |
| <i>AHK4</i>      | AT1G27320    | ATT CTA GCG ATG ACT<br>GCG GA         | CGA CGA AGG TGA<br>GAT AGG ATT       |
| <i>ARR1</i>      | AT3G16857    | ACA ACG GAA TGC TGA<br>TGC CTC T      | CAC TCT GCT GCT<br>CTC GGG GAT       |
| <i>ARR4</i>      | AT1G10470    | CGG AGA ATG TAT TGA<br>CCA GAA TC     | AGA AAT CTT GAG<br>CAC CTT CCT C     |
| <i>ARR5</i>      | AT3G48100    | CTA CTC GCA GCT AAA<br>ACGC           | GCC GAA AGA ATC<br>AGG ACA           |
| <i>ARR12</i>     | AT2G25180    | GTT TCC ATC ACC GCC<br>CAA TC         | CCG AAG GAG TAT<br>TGA GTC TGC CA    |
| <i>CRF6</i>      | At4g23750    | AAT CCG TTA CTG CTT<br>CTT CCT CC     | AGA CAC CGG AGA<br>GCA GAG ACA A     |
| <i>UBQ10</i>     | At4G05320    | GCG TCT TCG TGG TGG<br>TTT CTA A      | GAA AGA GAT AAC<br>AGG AAC GGA AAC A |

Sequence data from this article can be found in the National Center for Biotechnology Information <https://www.ncbi.nlm.nih.gov/>
