# Supplementary material for: Cytokinin Modulates Responses to Phytomelatonin in Arabidopsis thaliana under High Light Stress
Source: MDPI journal article supplement (doi:10.3390/ijms24010738), 2023-01-01
Supplement: s1 [file s1]

**Table S3.** (a) Influence of photostress of different duration and melatonin on the parameter Fv/Fm in the wild type; (b) Influence of different melatonin pretreatment times on its protective properties under photostress (TBARs). Different letters denote statistically significant differences between variants within the same genotype at  $p < 0.05$  (ANOVA with post hoc Tukey's multiple-comparison test)

| (a)                 |                           |
|---------------------|---------------------------|
| Conditions          | Values                    |
| 3 h                 |                           |
| Control             | 0.809±0.007 <sup>a</sup>  |
| Stress              | 0.625±0.014 <sup>b</sup>  |
| Control + melatonin | 0.810±0.011 <sup>a</sup>  |
| Stress + melatonin  | 0.673±0.019 <sup>c</sup>  |
| 9 h                 |                           |
| Control             | 0.812±0.015 <sup>a</sup>  |
| Stress              | 0.602±0.018 <sup>b</sup>  |
| Control + melatonin | 0.806±0.009 <sup>a</sup>  |
| Stress + melatonin  | 0.635±0.020 <sup>b</sup>  |
| 24 h                |                           |
| Control             | 0.815±0.014 <sup>a</sup>  |
| Stress              | 0.427±0.017 <sup>b</sup>  |
| Control + melatonin | 0.808±0.012 <sup>a</sup>  |
| Stress + melatonin  | 0.651±0.024 <sup>c</sup>  |
| (b)                 |                           |
| Conditions          | Values                    |
| 24 h                |                           |
| Control             | 2.356±0.128 <sup>a</sup>  |
| Stress              | 10.011±0.715 <sup>b</sup> |
| Control + melatonin | 2.504±0.089 <sup>a</sup>  |
| Stress + melatonin  | 8.011±0.077 <sup>c</sup>  |
| 72 h                |                           |
| Control             | 2.772±0.144 <sup>a</sup>  |
| Stress              | 9.518±0.807 <sup>b</sup>  |
| Control + melatonin | 2.824±0.196 <sup>a</sup>  |
| Stress + melatonin  | 5.877±0.442 <sup>c</sup>  |
